# Supplementary material for: Melanoma-specific MHC-II expression represents a tumour-autonomous phenotype and predicts response to anti-PD-1/PD-L1 therapy
Source: PubMed Central journal article supplement (PMC4740184; doi:10.1038/ncomms10582), 2016-01-29
Supplement: ncomms10582-s1.pdf [file ncomms10582-s1.pdf]

## Supplementary Figure 1

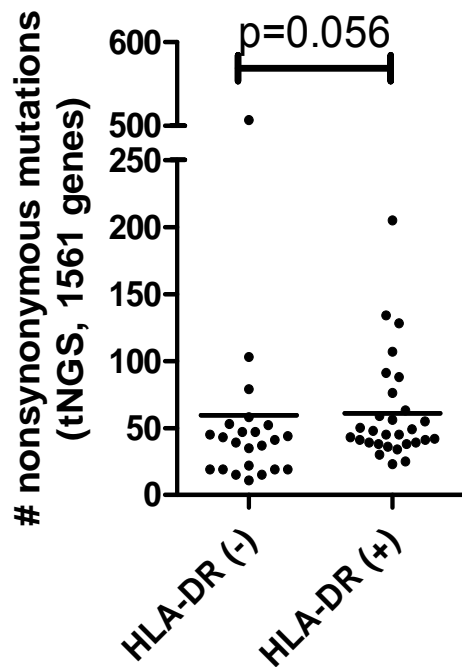

Supplementary Figure 1: HLA-DR(+) melanoma cell lines are associated with a higher mutational burden. CCLE melanoma cell lines (n=61) plotted against total expressed mutational burden. Number of non-synonymous mutations was determined by targeted sequencing of 1561 genes and these data and associated information are available in the CCLE project through the cBio portal (<http://www.cbioportal.org/>).

## Supplementary Figure 2

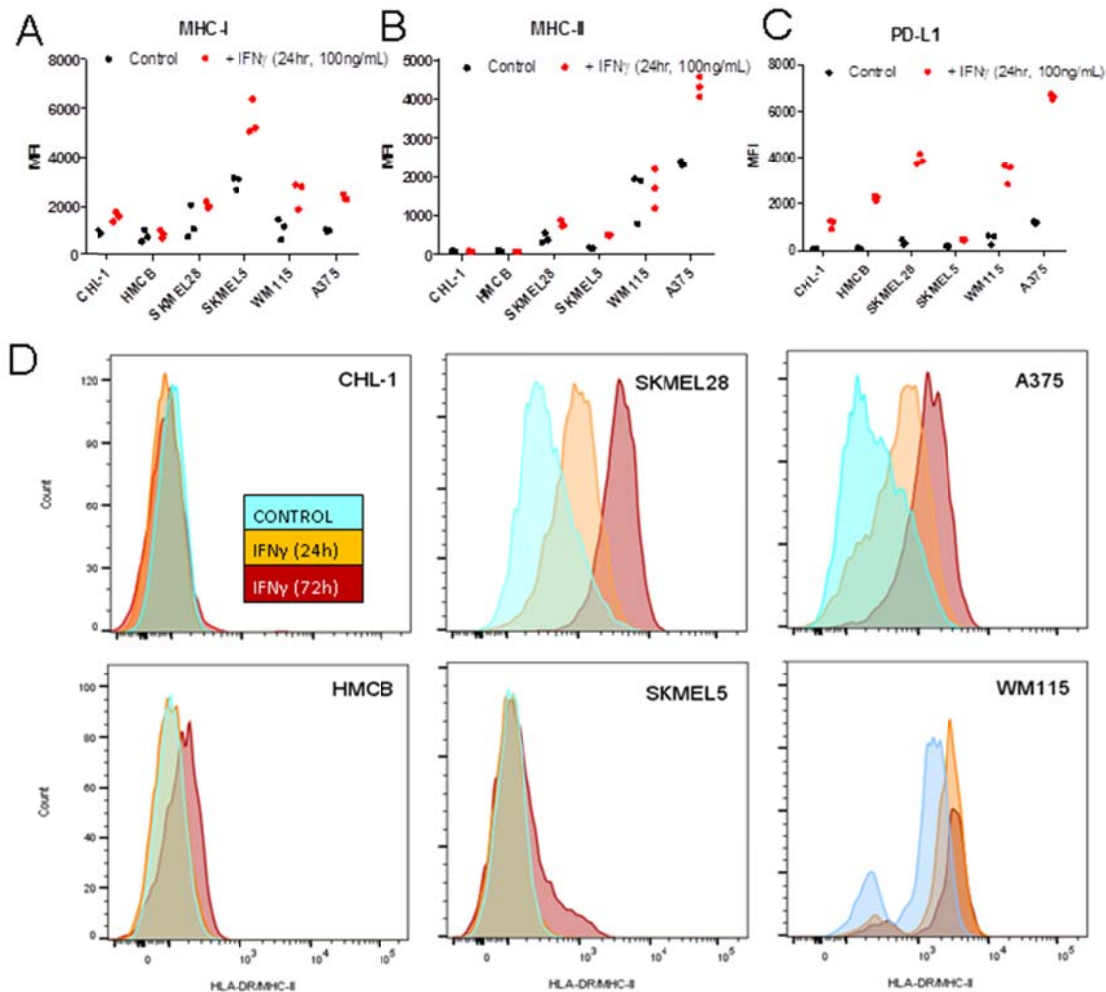

Supplementary Figure 2: Mean expression levels of MHC-I, MHC-II, and PD-L1 at baseline and after IFN $\gamma$  stimulation. Melanoma cell lines were treated with 100ng IFN $\gamma$  for 24hr (shown as percent positive in Fig. 2A-C) prior to harvest and live-cell staining and flow cytometry analysis for MHC-I/HLA-A/B/C (A), MHC-II/HLA-DR (B) and PD-L1 (C). Bars represent mean fluorescence intensity  $\pm$  SEM for 3 experiments. (D) Histograms of HLA-DR surface expression over an extended (24-72hr) IFN $\gamma$  treatment, as assessed by flow cytometry.

## Supplementary Figure 3

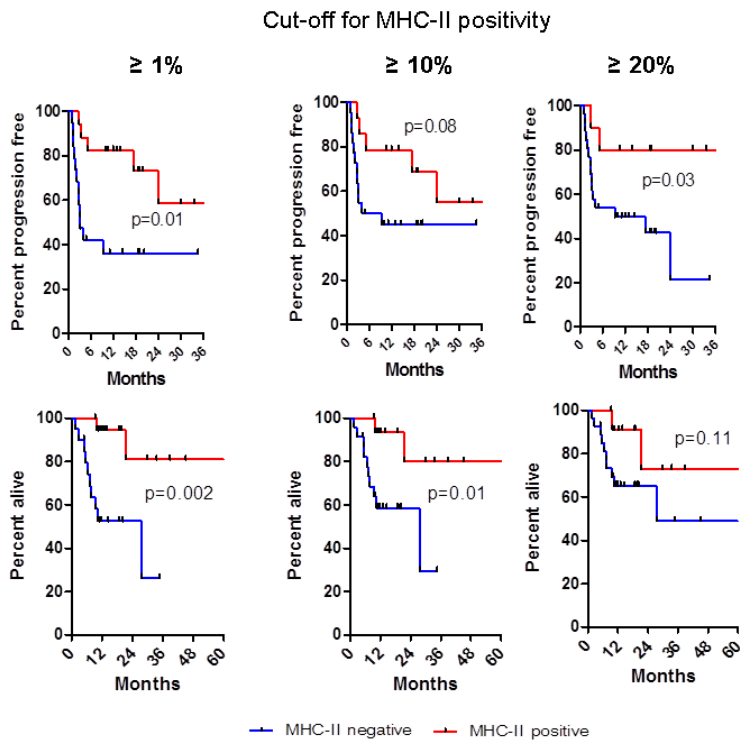

**Supplementary Figure 3: Progression-free and overall survival as a function of MHC-II positivity cut-points.** Statistical significance of PFS (top) and OS (bottom) were assessed by the log-rank statistic using different cut-points for HLA-DR positivity (1%, 10%, and 20% of tumor cells positive).

## Supplementary Figure 4

### Ipilimumab-treated (n=13)

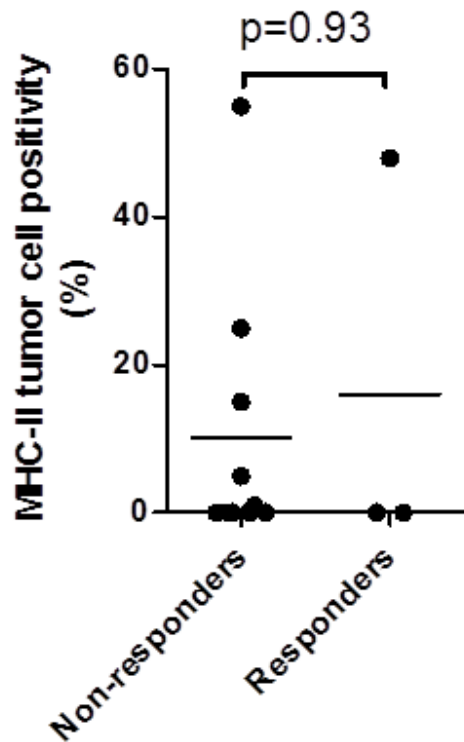

Supplementary Figure 4: MHC-II/HLA-DR positivity is not associated with ipilimumab response. Tumor membrane-specific HLA-DR expression quantified by IHC in excisional samples from patients (n=13) treated with ipilimumab (after tissue collection) were compared to treatment response. P-value represents the result of the Wilcoxon rank sum test for all responder groups versus non-responders (PD).

## Supplementary Figure 5

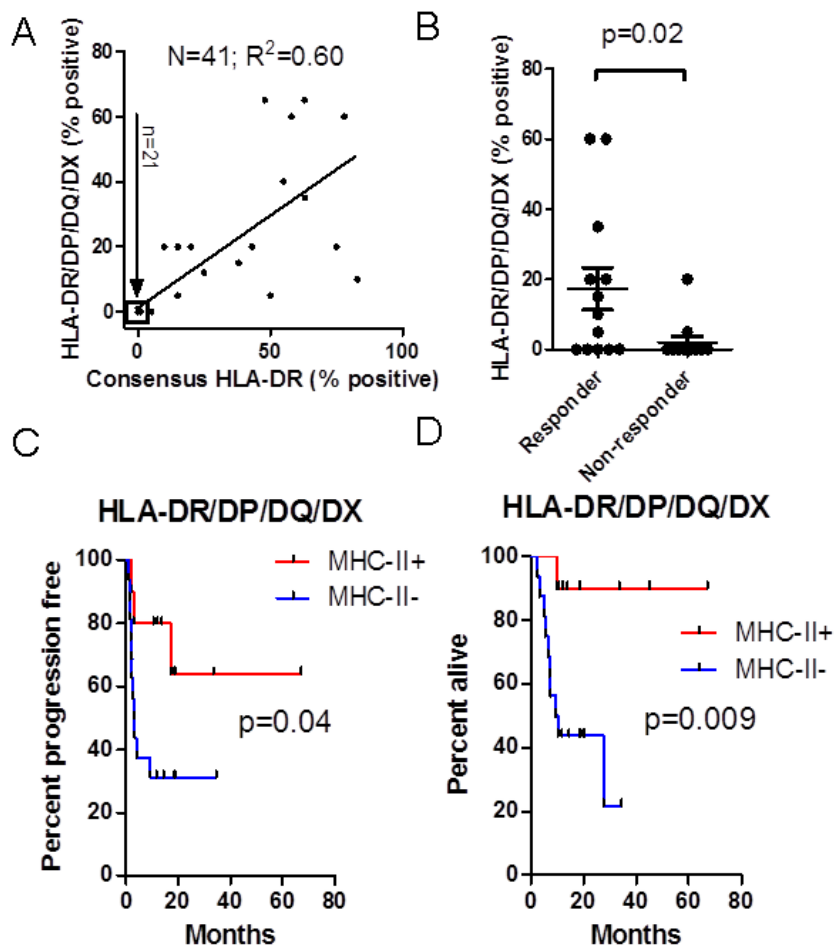

Supplementary Figure 5: High correlation of staining for two independent monoclonal antibodies for MHC-II in melanomas. A) Forty-one (41) melanoma sections were co-stained for HLA-DR and SOX10 or HLA-DR/DP/DQ/DX and SOX10 and percent of tumor cells in the entire section with MHC-II(+) membranes were calculated. There was a high degree of concordance between staining for the two antibodies. There are 21 data points at (0,0). B) HLA-DR/DP/DQ/DX positivity was used to test for association with clinical response as described for Figure 5A-B. P-value is the result of the Wilcoxon rank sum test. C) and D) PFS and OS respectively, in 26 patients (Discovery set only, non-evaluable stains excluded) discriminated on MHC-II (HLA-DR/DP/DQ/DX positivity, using a 5% cut-point (5% of total tumor cells staining positive on the entire section; no tumors stained between 1-5%). P-value represents the result of the log-rank test.

## Supplementary Figure 6

anti-PD-1/PD-L1 treated patients (n=28)

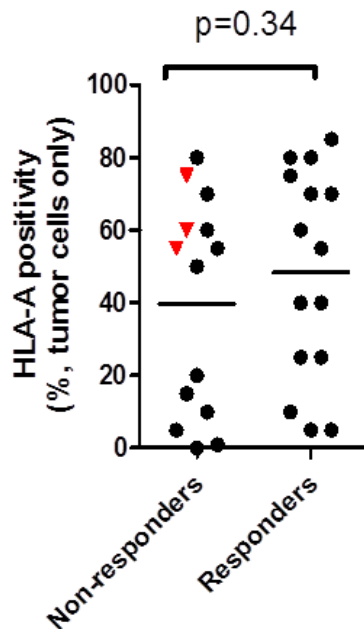

Supplementary Figure 6: MHC-I/HLA-A positivity is not associated with PD-1/PD-L1

targeted therapy response. Tumor membrane-specific HLA-A expression quantified by IHC in excisional samples from patients treated with PD-1/PD-L1 targeted therapy (after tissue collection) is compared to treatment response P-value represents the result of the Wilcoxon rank sum test for all responder groups versus PD. Mixed responders (n=3) are noted by a red triangle.

## Supplementary Figure 7

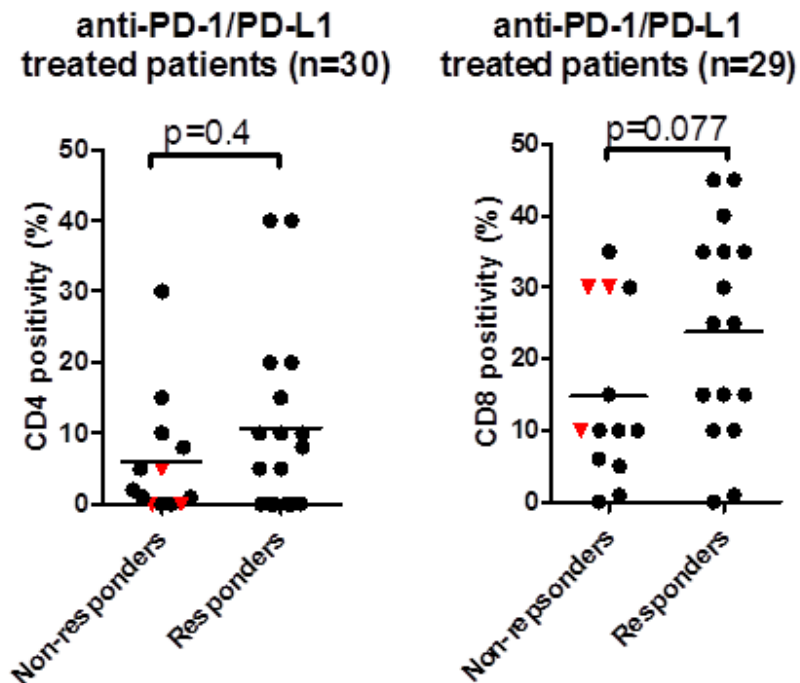

Supplementary Figure 7: CD4 positivity is not associated with PD-1/PD-L1 targeted therapy response. Tumor-infiltrating CD4(+) (left) and CD8(+) (right) cells quantified by IHC in excisional samples from patients treated with PD-1/PD-L1 targeted therapy (after tissue collection) is compared to treatment response. P-values are result of a Wilcoxon rank sum test for all responder groups versus PD. Mixed responders (n=3) are noted by a red triangle.

## Supplementary Figure 8

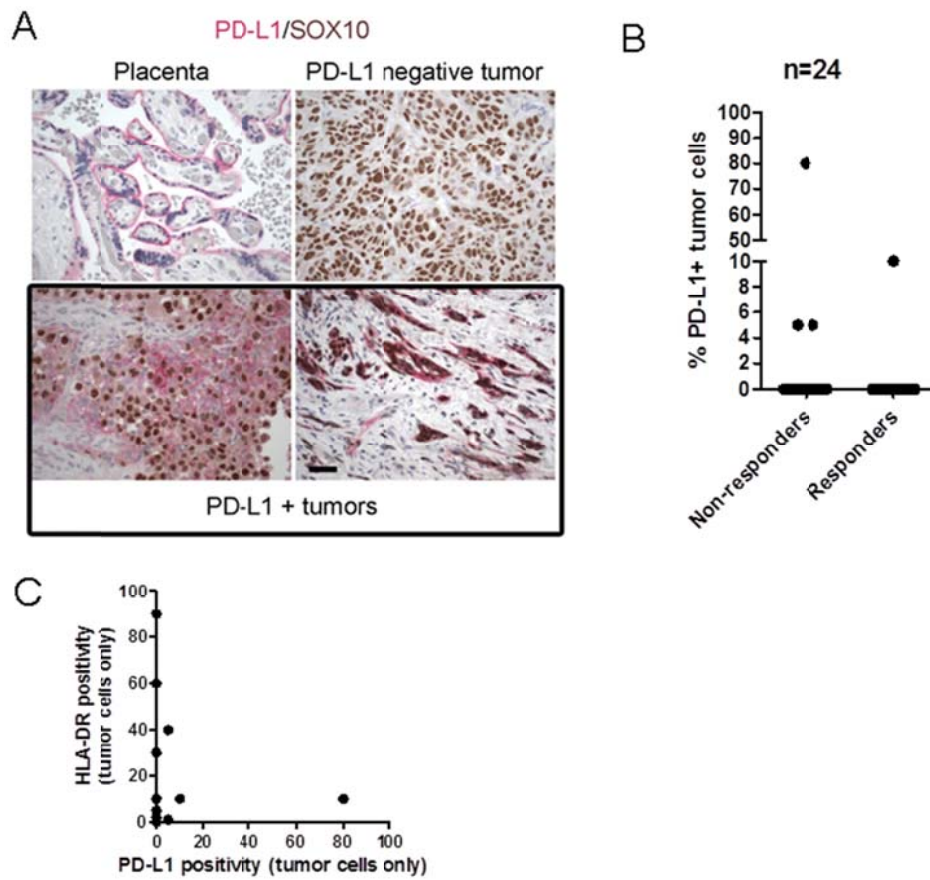

Supplementary Figure 8: Lack of PD-L1 staining with response to PD-1/PD-L1 targeted therapy. A) Representative immunostaining for SOX10 (brown/DAB) and PD-L1 (pink/Warp Red) in human placenta (positive control), a PD-L1 (-) tumor, and two PD-L1 (+) tumors. Scale bar: 50  $\mu$ m B) Lack of association of PD-L1 positivity with response in a series of 24 anti-PD-1/PD-L1-treated melanoma patients. Only 4/24 patients had PD-L1 positivity noted in the tumor compartment. C) Lack of correlation between tumor cell positivity of PD-L1 and HLA-DR by IHC staining.



## Supplementary Figure 9

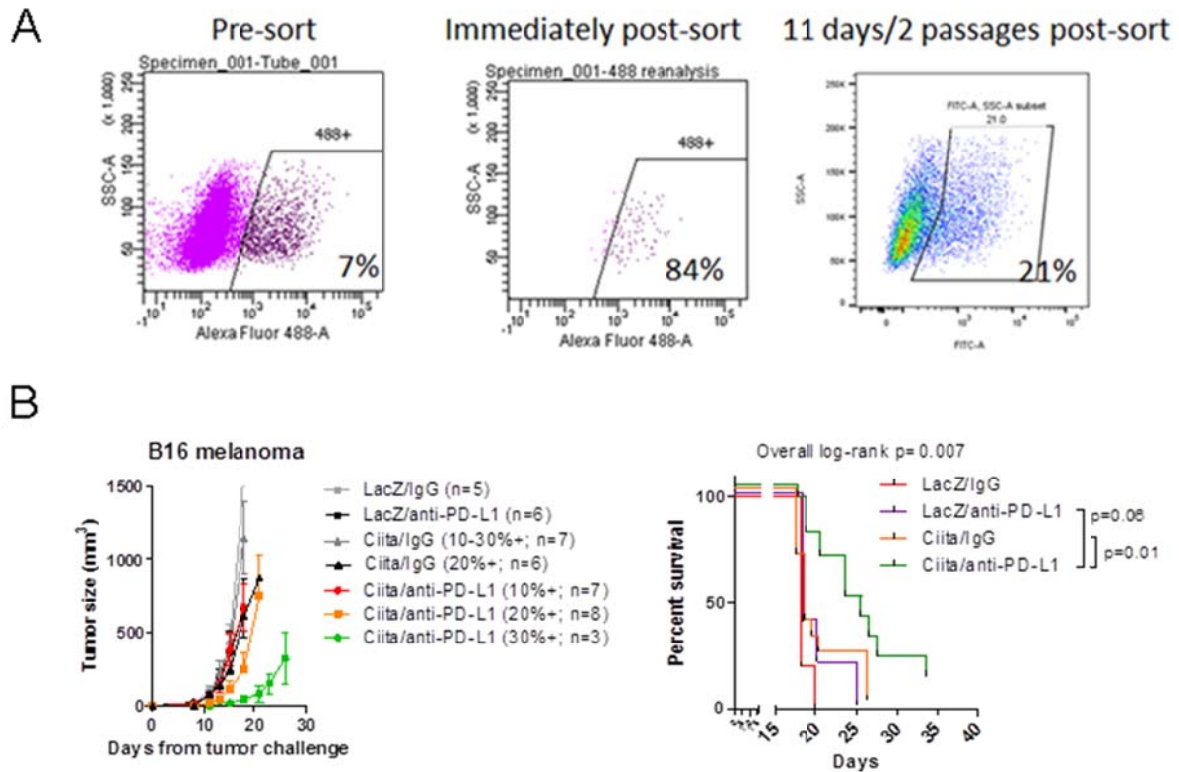

Supplementary Figure 9: Constitutive expression of MHC-II is selected against in B16 cells, but may have a functional role in response to anti-PD-L1 targeted therapy.

A) Flow cytometry sorting of B16/F0 melanoma cells (anti-IA/IE) after lentiviral transduction with mouse Ciita. LACZ was used as a control for lentiviral transduction. After sorting, the percent of MHC-II+ cells was rapidly selected against in culture, despite negative selection with puromycin. B) Lentivirally-transduced cells (50,000 LACZ or Ciita) were injected subcutaneously into the flanks of C57/BL6 mice, which were subsequently treated twice weekly with 100µg/100µL anti-mouse PD-L1 mAB (BioXcel) intraperitoneally beginning on day 1 after tumor challenge. For tumor challenge, 3 separate experiments were performed for Ciita+ cell injections (assessed by flow cytometry at the day of injection as containing 10, 20, or ~30% MHC-II/IA/IE+ cells). Tumor volume was measured thrice weekly. Survival curves combined all cohorts of Ciita+ injected mice. Tumor ulceration or tumors exceeding 1000mm<sup>3</sup> was used as an endpoint for survival.

| <b>Supplementary Table 1: Association of HLA-DR staining on melanoma tissue microarray with clinical variables (N = 66)</b> |               |             |         |
|-----------------------------------------------------------------------------------------------------------------------------|---------------|-------------|---------|
|                                                                                                                             | HLA-DR (+)    | HLA-DR (-)  | P value |
|                                                                                                                             | N = 20        | N = 46      |         |
| Age (average, years)                                                                                                        | 57.1          | 61.0        | 0.323   |
| Gender                                                                                                                      |               |             |         |
| Male                                                                                                                        | 12 (60%)      | 31 (67%)    | 0.562   |
| Female                                                                                                                      | 8 (40%)       | 15 (33%)    |         |
| Stage at resection/biopsy                                                                                                   |               |             |         |
| I-II                                                                                                                        | 2 (10%)       | 6 (13%)     | 0.755   |
| III                                                                                                                         | 6 (30%)       | 17 (37%)    |         |
| IV                                                                                                                          | 12 (60%)      | 23 (50%)    |         |
| LDH Elevated                                                                                                                | 2 (10%)       | 10 (22%)    | 0.149   |
| Mutation                                                                                                                    |               |             |         |
| BRAF <sup>V600</sup>                                                                                                        | 3 (15%)       | 10 (22%)    | 0.485   |
| NRAS <sup>Q61/G12/G13</sup>                                                                                                 | 6 (30%)       | 8 (17%)     |         |
| BRAF/NRAS wild type                                                                                                         | 11 (55%)      | 28 (61%)    |         |
| Primary tumor ulceration                                                                                                    | 7 (35%)       | 15 (33%)    | 0.124*  |
| Metastatic disease                                                                                                          | 18 (90%)      | 35 (76%)    | 0.192   |
| Liver involvement <sup>#</sup>                                                                                              | 2 (11%)       | 14 (40%)    | 0.030   |
| Lung involvement <sup>#</sup>                                                                                               | 10 (56%)      | 24 (69%)    | 0.349   |
| Brain involvement <sup>#</sup>                                                                                              | 7 (39%)       | 8 (35%)     | 0.220   |
| Median survival                                                                                                             | 35.0 mo       | 35.0 mo     | 0.950   |
| 95% confidence interval                                                                                                     | 4.3 – 65.7 mo | 0 – 78.2 mo |         |
| *Ulceration status unknown in 20 patients #Expressed as percentage of patients with metastatic disease                      |               |             |         |

| <b>Supplementary Table 2: Clinical characteristics of patients treated with ipilimumab (n=13)</b> |               |                   |
|---------------------------------------------------------------------------------------------------|---------------|-------------------|
|                                                                                                   | <i>Number</i> | <i>Percentage</i> |
| Age                                                                                               | 56 (median)   | 34-79 (range)     |
| Gender                                                                                            |               |                   |
| Male                                                                                              | 8             | 62                |
| Female                                                                                            | 5             | 38                |
| Stage                                                                                             |               |                   |
| M1a                                                                                               | 1             | 8                 |
| M1b                                                                                               | 2             | 15                |
| M1c                                                                                               | 10            | 77                |
| LDH Elevated                                                                                      | 5             | 38                |
| Mutation                                                                                          |               |                   |
| BRAF V600                                                                                         | 3             | 23                |
| NRAS Q61                                                                                          | 3             | 23                |
| BRAF/NRAS wild type                                                                               | 7             | 54                |
| Prior therapies                                                                                   | 0 (median)    | 0-3 (range)       |
| IL-2                                                                                              | 0             | 0                 |
| Anti-PD-1/PD-L1                                                                                   | 1             | 8                 |
| BRAF +/- MEK inhibitor                                                                            | 1             | 8                 |
| Cytotoxic chemotherapy                                                                            | 2             | 15                |

**Supplementary Table 3: Concordance of HLA-DR positivity between two clinical pathologists blinded to study results (IPI and anti-PD-1/PD-L1 treated patients)**

| Concordance               |               | Investigator 2 impression |           |           |               |
|---------------------------|---------------|---------------------------|-----------|-----------|---------------|
|                           |               | Negative                  | Positive  | Equivocal | Not evaluable |
| Investigator 1 impression | Negative      | <b>33</b>                 | 7         | 0         | 1             |
|                           | Positive      | 5                         | <b>22</b> | 0         | 0             |
|                           | Equivocal     | 0                         | 5         | <b>0</b>  | 0             |
|                           | Not evaluable | 2                         | 1         | 0         | <b>2</b>      |

**Supplementary Table 4: Consensus of HLA-DR positivity between two clinical pathologists blinded to study results (IPI and anti-PD-1/PD-L1 treated patients)**

|                           |                           | Consensus (# of cases) |          |               |
|---------------------------|---------------------------|------------------------|----------|---------------|
| Investigator 1 impression | Investigator 2 impression | Negative               | Positive | Not evaluable |
| Positive                  | Negative                  | 2                      | 3        | 0             |
| Negative                  | Positive                  | 5                      | 1        | 1             |
| Equivocal                 | Positive                  | 0                      | 5        | 0             |
| Not evaluable             | Negative                  | 0                      | 0        | 2             |
| Not evaluable             | Positive                  | 0                      | 0        | 1             |
| Negative                  | Not evaluable             | 0                      | 0        | 1             |
